# Supplementary material for: Survival Related Genes on Chromosomes 6 and 17 in Medulloblastoma
Source: Preprints.org preprint supplement (doi:10.20944/preprints202405.0820.v1), 2024-05-13
Supplement: Supplementary file 1 [file supplementary]

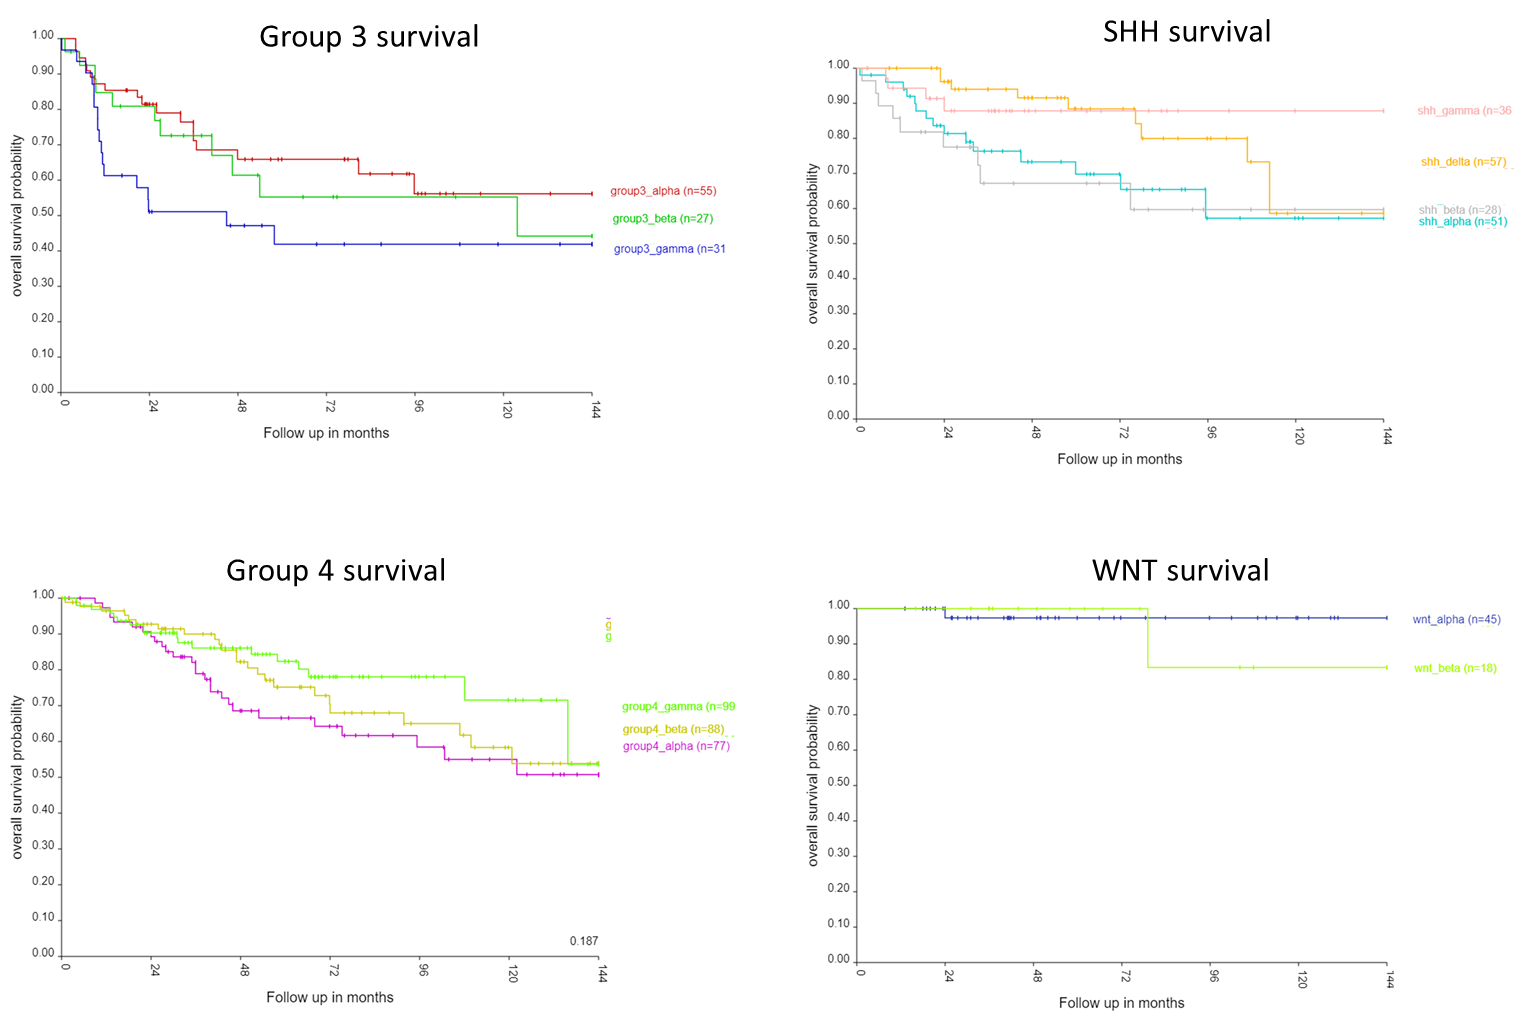


Supplemental Figure 1. Kaplan-Meier survival curves for MB subtypes


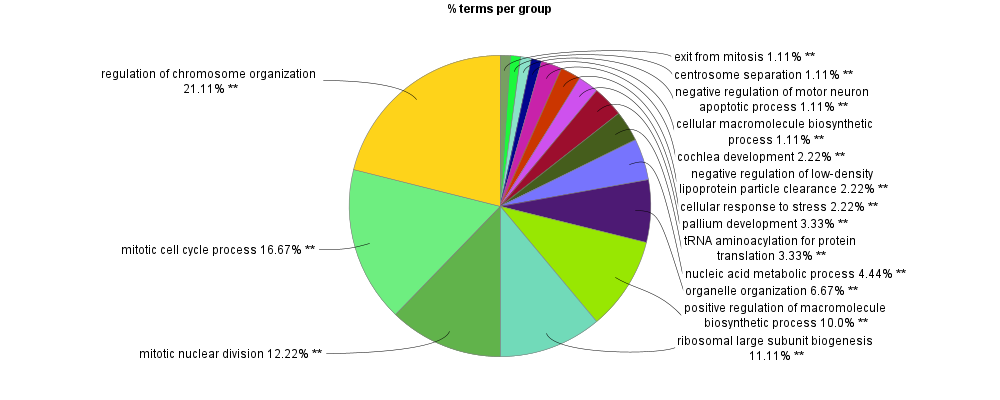


Supplemental Figure 2. Percentage of GO (Gene Ontology) terms per group for all SRGs

Supplemental Figure 3. Percentage genes per GO term for SRGs.
